2 **Shedding light on biogas: a transparent reactor triggers the development**  
4 **of a biofilm dominated by *Rhodopseudomonas faecalis* that holds**  
6 **potential for improved biogas production**

8 Christian Abendroth (1, 2)<sup>†</sup>, Adriel Latorre- Pérez (3)<sup>†</sup>, Manuel Porcar (3, 4), Claudia  
10 Simeonov (1), Olaf Luschning (5), Cristina Vilanova (3), Javier Pascual (3)\*

12 (1) Robert Boyle Institut e.V., Jena, Germany.  
14 (2) Technische Universität Dresden, Chair of Waste Management, Pratzschwitzer Str. 15,  
16 Pirna, Germany.  
18 (3) Darwin Bioprospecting Excellence, S.L., Paterna, Valencia, Spain.  
20 (4) Institute for Integrative Systems Biology (I2SysBio), Paterna, Valencia, Spain.  
22 (5) Bio H2 Umwelt GmbH, Jena, Germany.

\*Corresponding author: Javier Pascual ([jpascual@darwinbioprospecting.com](mailto:jpascual@darwinbioprospecting.com))

<sup>†</sup> Equal contributions

24 **Abstract**

26 Conventional anaerobic digesters intended for the production of biogas usually operate in  
28 complete darkness. Therefore, little is known about the effect of light on microbial  
communities operating in anaerobic digesters. In the present work, we have studied through  
16S rRNA gene amplicon Nanopore sequencing and shotgun metagenomic sequencing the  
taxonomic and functional structure of the microbial community forming a biofilm on the inner  
wall of a lab-scale transparent anaerobic biodigester illuminated with natural sunlight. The  
biofilm was composed of microorganisms involved in the four metabolic processes needed  
for biogas production. The biofilm proved surprisingly rich in *Rhodopseudomonas faecalis*, a

versatile bacterium able to carry out a photoautotroph metabolism when grown under  
30 anaerobic conditions. Our results suggest that this bacterium, able to fix carbon dioxide,  
could be considered for its use in transparent biogas fermenters in order to contribute to the  
32 production of optimized biogas with a higher CH<sub>4</sub>:CO<sub>2</sub> ratio than the biogas produced in  
regular, opaque digesters. To the best of our knowledge, this is the first study supporting  
34 illuminated bioreactors as a new bioprocess for the obtention of biogas enriched in methane.

36

**Keywords:** Anaerobic digestion, *Rhodopseudomonas faecalis*, optimized biogas, shotgun  
38 metagenomic sequencing, waste water treatment, phototrophism, 16S rRNA gene amplicon  
Nanopore sequencing.

40

## 1. Introduction

42 Anaerobic digestion (AD) of organic matter is a robust technology for biogas synthesis  
from different types of waste (Borjesson and Mattiasson, 2008), and numerous studies have  
44 been conducted to optimise the synthesis of biogas and evaluate potential substrates (Jiang  
et al., 2018). Anaerobic digesters can be fed with a wide range of substrates such as grass  
46 biomass (Abendroth et al., 2017), sewage sludge from water treatment (Hardegen et al.,  
2018), microalgal biomass (Doloman et al., 2017), and food waste (Yang et al., 2016), among  
48 others. The main goal of AD is the production of biogas, a renewable energy that can be  
used for heating, electricity, and many other operations that use combustion engines  
50 (Lindkvist et al., 2017). Biogas is a mixture of methane ( $\text{CH}_4$ ; 55-70% of the total volume),  
carbon dioxide ( $\text{CO}_2$ ; 30-40%) and traces of other gases such as hydrogen sulfide ( $\text{H}_2\text{S}$ )  
52 (Richards et al., 1994). Whereas methane is a flammable gas over a relatively large range of  
concentrations in air at standard pressure (5.4–17%), carbon dioxide is an inert gas.  
54 Therefore, increasing the  $\text{CH}_4$ : $\text{CO}_2$  ratio is one of the keystones for the production of high-  
quality biogas. The  $\text{CH}_4$ : $\text{CO}_2$  ratio can vary depending on the design of the biodigester, the  
56 substrate composition, as other factors such as temperature, pH, and substrate  
concentration (Hafner and Rennuit; 2017). An appropriate design of the anaerobic digester is  
58 thus central for the production of optimized biogas.

The microbial communities operating in the digester are the final key players responsible for  
60 the quality of the produced biogas. The role of different microorganisms in the four metabolic  
steps carried out during the AD of organic matter (hydrolysis, fermentation, acetogenesis,  
62 and methanogenesis) has been widely studied (Zinder, 1984). A diverse number of *Bacteria*  
are known to be involved in the hydrolysis and further fermentation of complex polymers,  
64 whereas the oxidation of intermediate fermentation products to acetate is performed by either  
hydrogen- or formate-producing acetogens (Stams & Plugge, 2009). Lastly, methane  
66 synthesis is mainly derived from acetate and  $\text{H}_2$ / $\text{CO}_2$  by acetoclastic and hydrogenoclastic  
methanogenic *Archaea*. Therefore, an improved understanding of the microbial communities

68 and their metabolic roles during the four stages of AD may also help to optimize biogas  
production in terms of quantity (yield) and quality (CH<sub>4</sub>:CO<sub>2</sub> ratio of the produced gas).

70 Over the past few years, next-generation sequencing techniques, such as 16S rRNA gene  
amplicon sequencing and shotgun metagenomic sequencing, have been applied to study the  
72 structure and composition of microbial communities in different types of anaerobic digesters  
(Hanreich et al., 2013; Sundberg et al., 2013; Maus et al., 2016; Abendroth et al., 2015;  
74 Abendroth et al., 2017a; Hardegen et al., 2018). These studies have shown that each type of  
bioreactor harbors a specific microbial community (Sundberg et al., 2013; Abendroth et al.,  
76 2015). Each particular community is determined by parameters such as the type of feedstock  
(Sundberg et al., 2013), temperature (Banach et al., 2018), retention time (Gaby et al., 2017),  
78 salt content (Wang et al., 2017; De Vrieze et al., 2017), viscosity (Hardegen et al., 2018), pH  
(Zhou et al., 2016), or the loading rate (Ciotola et al., 2014). Although the influence of many  
80 physicochemical parameters on microbial communities has been studied in anaerobic  
digesters, there is, to the best of our knowledge, no previous reports characterising the  
82 influence of light in the process (Sawayama, 2000; Tada et al., 2006; Wei et al., 2016;  
Reverso, 2017), mainly because the obvious fact that conventional AD systems operate in  
84 complete darkness. Interestingly, a previous study reported an increment of the relative  
concentration of methane when an anaerobic digester was operated under the influence of  
86 light (Tada et al., 2006). However, a holistic study of the effect of light on the entire  
microbiome of anaerobic digesters had yet to be addressed.

88 The aim of the present work was to analyse the effect of natural sunlight on the  
microbial community of a lab-scale anaerobic co-digester, in order to explore the potential of  
90 this strategy to produce high quality biogas. In order to reach that goal, we used full-length  
16S rRNA gene amplicon Nanopore sequencing, shotgun metagenomic sequencing and a  
92 complete bioinformatics analysis to unveil the structure and composition of the microbial  
community grown as a red-coloured biofilm over the transparent wall of a specifically  
94 designed transparent leach-bed bioreactor.

## 2. Material and Methods

98

### 2.1 Substrate and seed sludge

100 Untreated grass biomass (*Graminidae*) from a pasture in Jena (Germany) was used as  
feedstock. Collected grass biomass was characterised by a total solids content (TS) of  
102 30.4%, with 84.2% of the TS being volatile solids (VS). TS and VS were determined as  
described in Abendroth et al. (2017). One gram of fresh biomass showed a chemical oxygen  
104 demand (COD) of 260 mg O<sub>2</sub>/L. As seed sludge, sewage sludge from an anaerobic digester  
of the water treatment plant in Jena (Germany) was used.

106

### 2.2 Digestion conditions

108 The experiment was carried out in an open hall during summer of 2017. A transparent  
two-stage leach system of plexiglas® was built, and used to perform acidification of grass  
110 biomass in a leach-bed configuration and methanisation using an anaerobic filter as  
described in Abendroth et al. (2017). The anaerobic digester was placed in a location where  
112 it received indirect natural sunlight (ca. 10 hours daylight). The anaerobic digester was  
placed in a location where it received indirect natural sunlight (ca. 10 hours daylight). The  
114 acidification stage and the methane stage had a working volume of 20 L each and both  
stages were treated at mesophilic temperature (37 °C). Grass biomass was retained in a  
116 strainer during acidification. The methane stage was filled with 1.58 kg of bed packing (Hel-X,  
Christian Stöhr, Germany). Both stages were filled with sewage sludge at the beginning of  
118 the experiment: 8 L for the acidification stage and 11.75 L for the methane stage. For every  
batch cycle of acidification, 96.2 gL<sup>-1</sup> of fresh grass biomass were used. During acidification,  
120 the pH was kept at 6.0 using a pH-regulation system (BL 7916, Hanna Instruments,  
Germany). After each cycle, the collected liquor was stored at 4 °C. Each methane stage  
122 received daily approximately 100 gCOD (8.5 gCOD L<sup>-1</sup>). Gas production was quantified with  
a customized gas counter and collected in gasbags (Tecobag, Tesseraux, Germany) for  
124 further analysis.

126 *2.3 Sample collection and metagenomic DNA isolation.*

The anaerobic digester was operated for three weeks prior to sampling. Three  
128 independent biofilm samples (ca. 250  $\mu$ l each) were collected by scratching the inner  
bioreactor wall and further mixed in an Eppendorf tube. In order to reduce the amount of  
130 inhibiting substances, the biofilm sample was centrifuged (10 min at 20,000  $g$ ) and then  
washed several times with sterile phosphate-buffered saline (PBS) pH 7.2 until a clear  
132 supernatant was observed. Subsequently, metagenomic DNA was performed using the  
Power Soil DNA Isolation kit (MO BIO Laboratories) following the manufacturer's  
134 instructions. DNA concentration, quality and integrity were assessed with a Nanodrop-1000  
spectrophotometer (Thermo Scientific, Wilmington, DE) and on a 1.5% (w/v) agarose gel,  
136 respectively.

138 *2.4 Full-length 16S rRNA gene amplicon Nanopore sequencing*

The bacterial full-length 16S rRNA gene was amplified via PCR using the primer pair S-  
140 D-Bact-0008-a-S-16 (5'-AGRGTTYGATYMTGGCTCAG-3') and S-D-Bact-1492-a-A-16 (5'-  
TACCTTGTTAYGACTT-3') (Klindworth et al., 2013). The following reagents and  
142 concentration were used for the first PCR reaction: 200  $\mu$ M dNTPs, 200 nM of each primer, 1  
U of VWR Taq DNA Polymerase (VWR®, WR International bvba/sprl, Belgium), 1 X key  
144 Buffer supplemented with  $MgCl_2$  (1.5 mM), and 10 ng of DNA template (final volume: 50  $\mu$ L).  
PCR started with an initial denaturation step at 94°C for 1 min, followed by 35 cycles of  
146 amplification (denaturing, 1 min at 95°C; annealing, 1 min at 49°C; extension, 2 min at 72°C),  
and a final extension at 72°C for 10 min. A negative control without DNA template was  
148 included. Agencourt AMPure XP beads (Beckman Coulter) at 0.5X concentration were used  
to remove primer-dimers and non-specific amplicons. DNA concentration was measured  
150 using the Qubit™ dsDNA HS Assay kit (Qubit® 2.0 Fluorometer, ThermoFisher, Waltham,  
USA). Then, the Ligation Sequencing Kit 1D (SQK-LSK108) was used to prepare the  
152 amplicon library to load into the MinION™. The flow cell (R9.4, FLO-MIN106) was primed

and then loaded as indicated in the ONT™ protocols.

154 Reads were basecalled in real time using the MinKNOW™ software (version 1.13.1,  
standard sequencing protocol), and sequencing statistics were followed in real time using the  
156 EPI2ME debarcoding workflow. Porechop (<https://github.com/rrwick/Porechop>) was applied  
for removing the adaptors. By default, MinKNOW™ software removed reads with quality  
158 values lower than 7 in the PHRED score. The resulting sequences were analysed using the  
QIIME (Kuczynski *et al.*, 2011). Briefly, reads were taxonomically classified through BLAST  
160 searches against the latest version of the GreenGenes database (13.8; DeSantis *et al.*,  
2006). Rarefaction curves of the full-length 16S rRNA reads, including and excluding  
162 singletons, were obtained using iNEXT (v. 2.0.17) R package.

#### 164 2.5 Shotgun metagenomic sequencing

The biofilm sample was also subjected to shotgun metagenomic sequencing. Briefly, the  
166 Nextera XT Prep Kit protocol was followed for library preparation. Then, Illumina MiSeq®  
platform was used for sequencing. The parameters were adjusted to obtain pair-end  
168 sequences of 150 bp and a sequencing depth of 10 million of reads. Adapters were trimmed,  
and a quality filtering was applied with BBDuk (included in BBTools package; Bushnell B.,  
170 <https://sourceforge.net/projects/bbtools/> updated January 2, 2018). Reads shorter than 50 bp  
and/or with a mean quality lower than Q20 (in PHRED scale) were discarded. The quality  
172 parameters of the sequences were checked with FastQC  
(<http://www.bioinformatics.babraham.ac.uk/projects/fastqc>, version 0.11.7).

174 The quality-checked reads were taxonomically classified via Centrifuge (v. 1.0.3; Kim *et al.*,  
*et al.*, 2016) against a compressed database containing reference sequences from *Bacteria*  
176 and *Archaea* (updated April 15, 2018; available at <https://ccb.jhu.edu/software/centrifuge/>).

The shotgun sequences were assembled into contigs and scaffolds with the metaSPAdes  
178 pipeline included in SPAdes (v. 3.12.0; Nurk *et al.*, 2017). The statistics and attributes of the  
assembly were explored with QUASt (v. 4.6.3). Selected scaffolds were grouped into bins  
180 with MaxBin2 (v. 2.2.4; Wu *et al.*, 2015) in order to reconstruct metagenome-assembled

182 genomes (MAGs). CheckM (v1.0.11; Parks *et al.*, 2015) was used for assessing the quality and completeness of each MAG. Only high-quality MAGs, with completeness values greater than 50% and contamination values lower than 10%, were considered for further analyses.

184 The taxonomic affiliation of each MAG was assessed with the *Similar Genome Finder Service* tool of the PATRIC (Wattan *et al.*, 2017). This tool matched each MAG against a set  
186 of representative and reference genomes available in PATRIC (Wattan *et al.*, 2017) by using Mash/MinHash distances (Ondov *et al.*, 2016). Subsequently, a phylogenomic tree was  
188 inferred for each MAG in order to know their specific evolutionary history. The UBCG v. 3.0 pipeline (Up-to-date bacterial core gene set; Na *et al.*, 2018) was used to construct maximum  
190 likelihood trees based on a multiple alignment of a set of 92 to 90 universal and single copy gene sequences (Table S1). Despite the fact that the UBCG pipeline is optimized for  
192 bacterial genomes, it was also used for archaeal MAGs but using 23 universal and single copy genes. In order to investigate if each MAG belonged to a known species, pairwise  
194 average nucleotide identity values (ANI<sub>b</sub>) (Goris *et al.*, 2007) were calculated between each MAG and its closest type strain, by using the JSpeciesWS online tool (Richter *et al.*, 2015).  
196 Additionally, digital DNA-DNA hybridization (DDH) pairwise values were also obtained using the Genome-to-Genome Distance Calculator 2.1 (GGDC) tool (Meier-Kolthoff *et al.*, 2013).  
198 As recommended for incompletely sequenced genomes, Formula 2 was used for calculating the digital DDH values (Meier-Kolthoff *et al.*, 2013).

200

### 2.6 Functional analysis of the microbial community

202 The assembled metagenomic sequences, as well as the high-quality MAGs, were annotated using the RAST toolkit (RASTtk) (Brettinet *et al.*, 2015) implemented in the Genome  
204 Annotation Service in PATRIC (Wattam *et al.*, 2017). The carbohydrate-active enzymes (CAZyme) of each MAG were determined by identifying genes containing CAZymes domains  
206 using the dbCAN2 meta server (Zhang *et al.*, 2018). CAZyme domains were predicted by HMMER (E-Value < 1e-15, coverage > 0.35). The metabolic pathways reconstruction for  
208 each MAG was done comparing the protein-coding genes against the Kyoto Encyclopedia of



Genes and Genomes (KEGG) (Kanehisa et al., 2017) and MetaCyc metabolic pathways  
210 (Caspi et al., 2018).

## 212 **3. Results and Discussion**

### **3.1. Taxonomic diversity of the microbial community**

214 After three weeks operating the anaerobic digester, a bright, red-pigmented microbial  
biofilm appeared on the inner wall of the bioreactor (Fig. 1). Since the microbiome of the  
216 main content of the biodigesters has already been extensively studied (Hanreich et al., 2013;  
Sundberg et al., 2013; Maus et al., 2016; Abendroth et al., 2015; Abendroth et al., 2017;  
218 Hardegen et al., 2018), we focused on the characterisation of the microbiome of the red-  
pigmented biofilm developed on the transparent wall of the bioreactor.

220 The taxonomic profile of the microbiome of the biofilm was studied via 16S rRNA  
amplicon Nanopore sequencing as well as by sequencing the whole 16S rRNA gene without  
222 the need for *in silico* assembly (Kerkhof et al., 2017). After a quality filtering of the raw reads,  
a total of 11,163 16S rRNA sequences were retrieved and taxonomically classified. The  
224 median sequence length was 1,445 nt and the mean read quality was 9.8. Similarly to Ma et  
al. (2017), any attempt of clustering the reads into Operational Taxonomic Units (OTUs)  
226 using the closed-reference OTU picking method available in Qiime failed (i.e. each sequence  
was classified as an independent OTU). The number of reads obtained was enough to  
228 analyse the vast majority of the microbial species (Fig. S1A), thus enabling a comprehensive  
characterization of the microbial community. The saturation of the species richness was more  
230 evident when the singletons were excluded from the dataset (Fig. S1B).

The bacterial community was dominated by members of the phyla *Firmicutes*,  
232 *Bacteroidetes* and *Proteobacteria*, followed by *Chloroflexi*, *Spirochaetes* and the candidate  
phylum WS6 (Fig. 2A). Additionally, members of 43 phyla or candidate divisions were also  
234 identified (Table S1). This profile was similar to that found by other authors in dark AD  
(Hanreich et al., 2013; Sundberg et al., 2013; Maus et al., 2016; Abendroth et al., 2015;  
236 Abendroth et al., 2017). At the family level, *Gracilibacteraceae*, *Lachnospiraceae* and

*Tissierellaceae* were the dominant *Firmicutes*, while *Porphyromonadaceae* and  
238 *Bradyrhizobiaceae* were the most abundant *Bacteroidetes* and *Alphaproteobacteria*,  
respectively (Fig. 2A; Table S1). Additionally, 36 reads were classified as *Archaea*. However,  
240 since the primer pair used to amplify the 16S rRNA was optimized for *Bacteria* (Klindworth et  
al., 2013), all archaeal reads were excluded from the analysis.

242 Although the full-length sequence of the 16S rRNA gene was sequenced, a high  
number of phylotypes could only be classified up to the family level (Table S1), suggesting a  
244 high taxonomic novelty of the taxa. The high diversity of phylotypes recovered from the  
biofilm sample (723 phylotypes, Table S1), might be a consequence of the high error rate of  
246 the Nanopore sequencing technology. In fact, 46.6% of microbial phylotypes were singletons  
and nine phyla were represented by a single read (Table S1). Nevertheless, a study has  
248 recently demonstrated that the MinION technology has the ability to provide rRNA operon  
sequence data of sufficient quality for characterizing the microbiota of complex environmental  
250 samples and provides results that are reproducible, quantitative and consistent (Kerkhof et  
al., 2017). Another explanation why a high number of phylotypes were identified in the  
252 biofilm is that the seed sludge and the feedstock used was carrying a highly diverse microbial  
load (Kirkegaard et al., 2017), albeit those communities might not be metabolically active in  
254 the sampled biomass. An indication of the presence of inactive microorganisms in the  
community is the occurrence of obligate aerobic bacteria, such as *Arthrobacter* or *Devosia*  
256 (Table S1). Further studies based on metagenomic RNA would be necessary to distinguish  
between the phylotypes that are keyplayers in the biofilm and those that are merely  
258 transported by the influent as inactive microorganisms.

In order to complement the taxonomic information of the microbial community of the  
260 red-coloured biofilm, shotgun metagenomic sequencing was also performed. A total of  
8,903,087 high-quality pair-end reads with a median size of 150 nt were sequenced. The  
262 taxonomic classification of all the metagenomic reads is shown in Fig. 2B. Only 38.2 % of  
metagenomic reads mapped against the genomic database, corroborating the taxonomic  
264 novelty of the microorganisms that form the biofilm. Most of the reads mapped against

genomes of *Bradyrhizobiaceae*, specifically *Rhodopseudomonas palutris* (26.6% of total  
266 reads), followed by the *Porphyromonadaceae* species *Fermentimonas caenicola* (22.9%)  
and the archaeal species *Methanosarcina mazei* (4.7%). Interestingly, and in sharp contrast  
268 with what has been described for regular (dark) anaerobic digesters (Hanreich et al., 2013;  
Sundberg et al., 2013; Maus et al., 2016; Abendroth et al., 2015; Abendroth et al., 2017;  
270 Hardegen et al., 2018), the illumination of the bioreactor triggered an enrichment of  
*Rhodopseudomonas* (Fig. 2B). Similarly, other authors reported enrichment of  
272 *Rhodopseudomonas faecalis* in an illuminated anaerobic digester fed with swine sewage  
wastewater (Wei et al., 2016). In contrast to 16S rRNA sequencing results, the family  
274 *Gracilibacteraceae* was not abundant in the shotgun metagenomic data (Fig. 2). This type of  
taxonomic discrepancies between both sequencing approaches has previously been  
276 discussed by other authors (Tessler et al., 2017).

### 278 **3.2. Functional profile of the community and definition of microbial keyplayers**

A total of 6183 contigs composed by 38,667,755 nt were assembled from the shotgun  
280 metagenomic sequencing. 40,136 coding sequences (CDS) were identified after the  
functional annotation of contigs with RASTtk. 54.9% of CDS were identified as proteins with  
282 functional assignments, while the remaining CDS were annotated as hypothetical proteins.  
Furthermore, 556 tRNA, 53 rRNA, 583 CRISPR-repeats, 556 CRISPR-spacers and 27  
284 CRISPR-array sequences were also reported. 37% of the CDS were assigned to functional  
subsystems (Fig. 3; Table S3). The great majority of the CDS (36.8%) were involved in  
286 cellular metabolism, including genes engaged in the turnover of nutrients (Table S3). Genes  
related to protein processing accounted for 17.3%, while those for energy and DNA  
288 processing accounted for 12.4% and 6.5%, respectively (Fig. 3).

To date, many microbial ecology studies in anaerobic digesters have been based on  
290 16S rRNA OTUs. However, due to the great metabolic diversity of certain taxa as well as the  
impossibility to classify some OTUs at lower taxonomic levels, it is difficult to predict the  
292 accurate functional roles that each microorganism plays during the AD (Kirkegaard et al.,

2017). Therefore, in order to shed light on the key microorganisms and their metabolic  
294 functions in anaerobic digesters when operated under the influence of natural sunlight,  
assembled contigs were binned as MAGs. Eight out of the 24 MAGs obtained passed the  
296 filter of contamination and completeness (Table 1). The number of scaffolds of the eight high-  
quality MAGs ranged from 141 to 985 and the estimated genome size, from 1.2 Mb to 4.0 Mb  
298 (Table 1). The G+C content of four MAGs was equal to or less than 37.0% and none of them  
showed a value greater than 64.2% (Table 1). MAG 9 harboured chimeric ribosomal RNA  
300 operons and hence their 16S rRNA gene sequences could not be used for taxonomic  
purposes, while other MAGs like MAG 16 did not include any ribosomal RNA operon. The  
302 MAG 1 was identified as a member of the species *Rhodopseudomonas faecalis* (Table 2;  
Fig. S1). MAG 2 was identified as a strain of the *Fermentimonas caenicola* species, while  
304 MAG 16 was identified as *Methanosarcina mazei*. The ANI and digital DDH values between  
MAGs 1, 2 and 16 and the type strains of phylogenetically close species were higher than  
306 the threshold established to circumscribe prokaryotic species, namely 95% for ANI values  
(Richter and Rosselló-Móra, 2009) and 70% for digital DDH (Meier-Kolthoff et al., 2013).  
308 Therefore, both genome-related indexes (Chun and Rainey, 2014) confirmed the adscription  
of MAGs 1, 2 and 16 to previously known species. Based on the number of reads obtained  
310 from the shotgun metagenomic sequencing, MAG 1 (*Rhodopseudomonas faecalis*) and MAG  
2 (*Fermentimonas caenicola*) were the most abundant bacteria in the red-pigmented biofilm;  
312 while MAG 16 (*Methanosarcina mazei*) was the only archaeon identified in the community  
(Fig 2). Contrarily, the other five MAGs could not be identified at the species level, but at the  
314 genus level or even a higher taxonomic rank (Table 2). MAG 4 was classified as a new taxon  
of the family *Anaerolinaceae* (phylum *Chloroflexi*), being closely related to the strain  
316 *Anaerolinea* sp. CP2\_2F, a bacterium recently isolated from a methanogenic waste water  
treatment system (Matsuura et al., 2015). Two MAGs were classified as members of the  
318 *Spirochaetaceae* family. Specifically, MAG 5 was closely related to *Sphaerochaeta globosa*  
Buddy<sup>T</sup>, a strain isolated from an anoxic river sediment (Ritalahti et al., 2012), while MAG 11  
320 was identified as a new species of the genus *Treponema*. MAG 10 was classified as a novel

lineage of the family *Gottschalkiaceae*, being phylogenetically related to the *Gottschalkia*  
322 *purinilytica* DSM 1384<sup>T</sup> (Poehlein et al., 2017). Finally, MAG 9 was classified as a hitherto  
unknown taxon of the family *Erysipelotrichaceae* (phylum *Firmicutes*).

324

### **3.3. Affiliation of functional CDS to the four stages of anaerobic digestion**

#### 326 3.3.1 Hydrolysis of complex polymers

A total of 108 different glycoside hydrolases families (Carbohydrate-Active enZymes  
328 Database; Lombard et al., 2014) were found in the eight high-quality MAGs (Fig. 4; Table  
S4). The microorganism with a greater repertoire of glycoside hydrolases was MAG 4  
330 (*Anaerolinaceae* sp.), which contains 104 glycoside hydrolases of over 49 families. MAG 2  
(*Fermentimonas caenicola*) codified for 82 glycoside hydrolases of 41 different families; and  
332 MAG 11 (*Treponema* sp.) encoded 54 glycoside hydrolases belonging to 36 families.  
Furthermore, MAGs 4, 2 and 3 were also the major producers of carbohydrate esterases  
334 (Fig. 4; Table S4). Representatives of glycosyl transferase families GT2\_Glycos\_transf\_2 and  
GT4 were found in the eight MAGs. Moreover, MAG 4 contained a high number of  
336 GT2\_Glycos\_transf\_2-coding genes, specifically 18 protein-coding genes (Fig. 4; Table S4).  
Only a single polysaccharide lyase, encoded by MAG 5, was detected in the whole  
338 metagenome.

The nature of the substrate determines the type of bacteria involved in the hydrolysis  
340 step. Preeti Rao et al. (1993), observed that digesters fed with cow manure supported more  
amylolytic microorganisms, whereas digesters fed with poultry waste showed higher  
342 proteolytic populations. Since our anaerobic digester was fuelled with untreated grass  
biomass, a dominance of cellulolytic, hemicellulolytic and lignolytic bacteria such as  
344 *Chloroflexi*, *Bacteroides*, *Spirochaetes* and *Clostridium* was expected (Pinnell et al., 2014).

#### 346 3.3.2 Acidogenesis

Except for MAG 9 (*Erysipelotrichaceae*) and MAG 16 (*Methanosarcina mazei*), all the  
348 other MAGs showed a potential fermentative metabolism based on a functional analysis of

their genomes (Table 3). MAG 1 (*Rhodopseudomonas faecalis*), 10 (*Gottschalkiaceae* sp.)  
350 and 11 (*Treponema* sp.) were able to carry out the fermentation of pyruvate to lactate with  
lactate dehydrogenase enzymes (Table 3; Table S5). MAGs 2 and 5 were able to conduct the  
352 transformation of pyruvate to (R)-2-acetoin through acetolactate synthase (EC 2.2.1.6) and  
acetoin dehydrogenase E1 (EC 2.3.1.190) enzymes (Table S5). The presence of the  
354 acetolactate synthase enzyme (EC 2.2.1.6) was also observed in MAGs 1, 4 and 11. MAG 2  
was able to generate (R, R)-2,3-butanediol from (R)-2-acetoin with the 2,3-butanediol  
356 dehydrogenase enzyme (EC 1.1.1.4). MAG 11 encoded two acetaldehyde dehydrogenases  
(EC 1.2.1.10), while MAG 4 encoded alcohol dehydrogenase (EC 1.1.1.1) and pyruvate  
358 formate-lyase (EC 2.3.1.54) enzymes, allowing the transformation of acetaldehyde to ethanol  
and pyruvate to formate, respectively.

360

### 3.3.3 Acetogenesis

362 In our anaerobic digester operating under the influence of natural sunlight,  
*Methanosarcina* (MAG 16) was the only microorganism harboring the genes corresponding  
364 to the Wood-Ljungdahl pathway (Table 3; Table S6). The Wood-Ljungdahl pathway coupled  
to the methanogenesis is one of the most ancient metabolisms for energy generation and  
366 carbon fixation in *Archaea* (Borrel et al., 2016). The alternative acetogenesis pathway  
(acetogenesis by dehydrogenation or syntrophic acetogenesis) is based on the anaerobic  
368 oxidation of long and short chain (volatile) fatty acids. MAGs 2 (*Fermentimonas caenicola*)  
and 4 (*Anaerolinaceae* sp.) contained some key genes involved in the conversion of  
370 propionate to acetate (Table 3; Table S5). Additionally, MAG 4 and MAG 11 (*Treponema* sp.)  
contained the enzymes necessary to perform the conversion of acetyl-CoA to acetate,  
372 namely acetate kinase (EC 2.7.2.1) and phosphate acetyltransferase (EC 2.3.1.8).

### 374 3.3.4 Methanogenesis

The amount of methane produced in the anaerobic digester illuminated with natural  
376 sunlight ranged was approximately 400 ml/gCOD L<sup>-1</sup>. Interestingly, *Methanosarcina* (MAG

16) was the only methanogenic archaeon detected in the red-pigmented biofilm (Fig. 2B).  
378 MAG 16 harboured all the protein-coding genes in the acetoclastic pathway for methane  
production, except tetrahydromethanopterin S-methyltransferase (EC 2.1.1.86) and methyl-  
380 coenzyme M reductase (EC 2.4.8.1). However, both genes were also found in the whole  
metagenome and were identified as closely related to *Methanosarcina mazei* S-6  
382 (NZ\_CP009512.1). Despite that *Methanosarcina* has also been described as a  
hydrogenoclastic methanogen (De Vrieze et al., 2012), the key genes required for the  
384 utilization of H<sub>2</sub> and CO<sub>2</sub> for methane production were not found in MAG 16 (Table S6).  
Previous research found that approximately 70% of the methane produced in the digestion of  
386 domestic sludge comes from the transformation of acetate to methane by the acetoclastic  
methanogens (Jeris and McCarty, 1965). Usually, *Methanothrix* (formerly named  
388 *Methanosaeta*) and *Methanosarcina* co-exist in the anaerobic digesters and their relative  
abundances are driven by the acetate concentration (Conklin et al., 2006). *Methanosarcina*  
390 has greater rates of acetate utilization and growth, and greater half-saturation and yield  
coefficients compared to *Methanothrix* (Conklin et al., 2006). Therefore, a possible cause for  
392 the dominance of *Methanosarcina mazei* over *Methanothrix* species in the illuminated  
anaerobic digester may be the high concentration of acetate in the biomass. *Methanosarcina*  
394 is as very robust methanogen able to adapt to environmental changes (De Vrieze et al.,  
2012), as well as an efficient methane producer (Tada et al., 2006; De Vrieze et al., 2012).  
396 Indeed, a previous study assessing the effect of light on methane production during AD  
reported an enrichment of *Methanosarcina* spp. coupled with an increment in methane  
398 production (Tada et al., 2006). This suggests, in concordance with our results, that anaerobic  
digesters operated under light conditions may results in an enrichment of *Metanosarcina*.  
400 Direct interspecies electron transfer (DIET) is a process that takes place during AD and is of  
great importance, as it may significantly accelerate methanogenesis (Kato et al., 2012; Kato  
402 et al., 2018). It can be enhanced by adding electrically conductive particles. So far,  
*Methanothrix* and *Methanosarcina* are the only genera where DIET has been proved.  
404 However, since *Methanothrix* typically grows at acetic acid concentrations lower then 3000

mg L<sup>-1</sup> (De Vrieze, 2014), *Methanosarcina* remains as the only known methanogen, which  
406 can apply DIET within high-performance digesters with high COD concentrations. Therefore,  
the illumination of anaerobic digesters might enhance the application of DIET due to its  
408 enrichment of *Methanosarcina*.

#### 410 3.4. Functional novelty and implications

Unlike conventional anaerobic digesters operating in complete darkness, an enrichment  
412 of *Rhodopseudomonas faecalis* (MAG 1) took place when the anaerobic digester was  
illuminated with natural sunlight. *R. faecalis* is a common purple non-sulfur (PNS) bacterium  
414 able to carry out a wide range of metabolic pathways (Boone and Mah, 2015). MAG 1 has  
the entire repertoire of enzymes needed to synthesize a photosystem II-type photosynthetic  
416 reaction center (Table 3; Table S7). Photosynthetic reaction centers are complexes  
composed of several proteins, pigments and other co-factors that, together, execute the  
418 primary energy conversion reactions of photosynthesis. The pigments produced by  
*Rhodopseudomonas palustris*, closely related to *R. faecalis*, are both  
420 bacteriochlorophyll(BChl)-a and bacteriopheophytin(BPhe)-a (Mizoguchi et al., 2012).  
Therefore, the red to brownish-red colour of the biofilm developed in the bioreactor is very  
422 likely due to the massive presence of *Rhodopseudomonas faecalis* in the biofilm, although  
analysis with liquid chromatography-mass spectrometry would be necessary in order to  
424 confirm this hypothesis. MAG 1 is able to carry out the CO<sub>2</sub> fixation via the Calvin-Benson  
cycle under anaerobic conditions (Table S7). In this process, CO<sub>2</sub> and ribulose biphosphate  
426 (5-carbon sugar) are transformed into 3-phosphoglycerate (Zheng et al., 2018). Interestingly,  
no other microorganisms of the community showed a phototrophic metabolism or presented  
428 the complete Calvin–Benson–Bassham (CBB) cycle. Only MAG 16 (*Methanosarcina mazei*)  
harboured a type III ribulose-1,5-bisphosphate carboxylase-oxygenase (RuBisCO) (Table 3;  
430 Table S6). Nevertheless, the type III RuBisCO participates in adenosine 5'-monophosphate  
(AMP) metabolism, a role that is distinct from that of classical RuBisCOs of the CBB cycle



432 (Sato et al., 2007). MAG 1 (*Rhodopseudomonas faecalis*) has also a diazotrophic  
metabolism. It is able to fix N<sub>2</sub> with a molybdenum-iron nitrogenase (Table 3; Table S7).

434

The enrichment of *R. faecalis* linked to the illumination of anaerobic digesters we report here  
436 could be further developed and used for the production of optimized biogas with a high  
CH<sub>4</sub>:CO<sub>2</sub> ratio. In fact, a previous study reported an increment of methane production when  
438 the anaerobic digester operated under the influence of light, although a potential increment of  
*Rhosopseudomonas* species was not investigated by the authors (Tada et al., 2006).  
440 Although the biogas generated from anaerobic digestion processes is clean, carbon neutral,  
and environment-friendly, raw biogas often needs to be purified prior to its use. To date,  
442 several strategies have been designed to substantially reduce CO<sub>2</sub> via chemical absorption  
(Akkarawatkhoosith et al., 2018). However, this process is expensive. Our findings support  
444 the possibility of biologically generating optimized biogas. Since *R. faecalis* has a  
photoautotrophic metabolism under anaerobic conditions, it can theoretically increase the  
446 CH<sub>4</sub>:CO<sub>2</sub> ratio of the produced biogas through the fixation of CO<sub>2</sub>. The CH<sub>4</sub>:CO<sub>2</sub> could be  
further increased by the action of iron-iron (Fe-only) nitrogenases, which have been recently  
448 reported to reduce CO<sub>2</sub> simultaneously with nitrogen gas and protons to yield CH<sub>4</sub>, ammonia  
and hydrogen gas in a single enzymatic step (Zheng et al., 2018). Even though no iron-iron  
450 nitrogenases were detected in MAG 1 (*R. faecalis*) or in the whole metagenome, other  
*Rhodopseudomonas* strains harboring those enzymes could be useful to generate optimized  
452 biogas (Zheng et al., 2018).

Since the enrichment of *R. faecalis* in anaerobic digesters is expected to be dependent on  
454 the amount of light that can pass through the wall of the reactor, as well as on the ratio  
surface:volume of the reactor, the specific design and of illuminated anaerobic digesters is a  
456 critical and yet complex issue. Our results pave the way for future research aiming at  
optimising the development of *R. faecalis* light-dependent biofilms in order to optimize  
458 methane-rich biogas production in full-scale reactors.

#### 460 **4. Conclusions and further considerations**

In the present work, we have carried out a complete study of a biofilm developing on the  
462 transparent wall of a lab-scale anaerobic digester operated under sunlight conditions. The  
microbial community harbored members involved in the four metabolic stages needed for the  
464 anaerobic digestion of organic matter, namely breakdown of polymers into monomers,  
acidification, acetogenesis and methanogenesis. *Methanosarcina* was the dominant  
466 methanogen in the anaerobic digester. The key difference with regard to conventional  
bioreactors that operate in darkness was a very significant enrichment of *R. faecalis*, a purple  
468 non-sulfur bacterium with a photoautotroph metabolism under anaerobic conditions. The  
ability of this bacterium to assimilate carbon dioxide through the CBB cycle, and its  
470 compatibility with the biogas process as well as with the rest of the microbiome opens up the  
striking possibility of producing optimized biogas from biomass through specifically designed,  
472 illuminated reactors.

#### 474 **Acknowledgements**

We are thankful for the funding received from the German Ministry of Economic Affairs and  
476 Energy (grant no. 16KN070128, 16KN070126). Moreover, we also thank Justus Hardegen,  
Andreas Underberg and Anja Schmidt for technical assistance. Adriel Latorre is a recipient of  
478 a Doctorado Industrial fellowship from the Ministerio de Ciencia, Innovación y Universidades  
(reference DI-17-09613).

480

#### **Conflict of Interest**

482 The authors declare no conflict of interest.

#### 484 **References**

486 Abendroth, C., Vilanova, C, Günther, T., Luschning, O., Porcar, M. (2015) *Eubacteria* and  
*Archaea* communities in seven mesophile anaerobic digester plants. *Biotechnol Biofuels*;  
488 8:87.

- 490 Abendroth, C., Hahnke, S., Simeonov, C., Klocke, M., Casani-Miravalls, M., Ramm, P.,  
Bürger, C., Luschnig, O., Porcar M. (2017a). Microbial communities involved in biogas  
492 production exhibit high resilience to heat shocks. *Bioresour Technol*; 249: 1074 – 1079.
- 494 Abendroth, C., Simeonov, C., Peretó, J., Antúnez, O., Gavidia, R., Luschnig, O., Porcar, M.  
(2017b). From grass to gas: microbiome dynamics of grass biomass acidification under  
496 mesophilic and thermophilic temperatures. *Biotechnol Biofuels*; 10(1): 171.
- 498 Akkarawatkhoosith, N., Kaewchada, A., Jaree, A. (2018). High-throughput CO<sub>2</sub> capture for  
biogas purification using monoethanolamine in a microtube contactor. *Journal of the Taiwan*  
500 *Institute of Chemical Engineers*. In press.
- 502 Banach, A., Ciesielski, S., Bacza, T., Pieczykolan, M., Ziemińska-Buczyńska, A. (2018).  
Microbial community composition and methanogens' biodiversity during a temperature shift in  
504 a methane fermentation chamber. *Environ Technol*. 3: 1 – 12.
- 506 Boone, D.R., Mah, R.A. (2015). *Methanosarcina*. In *Bergey's Manual of Systematics of*  
*Archaea and Bacteria* (eds W. B. Whitman, F. Rainey, P. Kämpfer, M. Trujillo, J. Chun, P.  
508 DeVos, B. Hedlund and S. Dedysh).
- 510 Börjesson, P., Mattiasson, B. (2008). Biogas as a resource-efficient vehicle fuel. *Trends*  
*biotechnol*; 26(1): 7 – 13.
- 512  
Borrel, G., Adam, P. S., Gribaldo, S. (2016). Methanogenesis and the Wood–Ljungdahl  
514 pathway: an ancient, versatile, and fragile association. *Genome Biol Evol*; 8(6): 1706 – 1711.
- 516 Brettin, T., Davis, J.J., Disz, T., Edwards, R.A., Gerdes, S., Olsen, G.J., Olson, R., Overbeek,  
R., Parrello, B., Pusch, G.D., Shukla, M., Thomason, J.A., Stevens, R., Vonstein, V., Wattam,  
518 A.R., Xia, F. (2015). RASTtk: a modular and extensible implementation of the RAST  
algorithm for building custom annotation pipelines and annotating batches of genomes. *Sci*  
520 *Rep* 5: 8365.
- 522 Caspi, R., Billington, R., Fulcher, C.A., Keseler, I.M., Kothari, A., Krummenacker, M.,  
Latendresse, M., Midford, P.E., Ong, Q., Ong, W.K., Paley, S., Subhraveti, P., Karp, P.D.

- 524 (2018). The MetaCyc database of metabolic pathways and enzymes. *Nucleic Acids Res* 46:  
D633–D639.
- 526
- Chun. J, Rainey, F.A. (2014). Integrating genomics into the taxonomy and systematics of the  
528 *Bacteria* and *Archaea*. *Int J Syst Evol Microbiol*; 64:316 – 324
- 530 Ciotola, R.J., Martin, J.F., Tamkin, A., Castaño, J.M., Rosenblum, J., Bisesi, M.S., Lee, J.  
(2014). The Influence of loading rate and variable temperatures on microbial communities in  
532 anaerobic digesters. *Energies*; 7: 785 – 803.
- 534 Conklin, A., Stensel, H.D., Ferguson, J. (2006). Growth kinetics and competition between  
*Methanosarcina* and *Methanosaeta* in mesophilic anaerobic digestion. *Water Environment*  
536 *Research*; 78(5): 486 – 496.
- 538 DeSantis, T., Hugenholtz, P., Larsen, N., Rojas, M., Brodie, E., Keller, K., Huber, T., Dalevi,  
D., Hu, P. and Andersen, G. (2006). Greengenes, a Chimera-Checked 16S rRNA Gene  
540 Database and Workbench Compatible with ARB. *Appl Environ Microbiol*; 72(7): 5069 – 5072.
- 542 De Vrieze, J., Hennebel, T., Boon, N., Verstraete, W. (2012). *Methanosarcina*: The  
rediscovered methanogen for heavy duty biomethanation. *Bioresour Technol*; 112: 1 – 9.
- 544
- De Vrieze, J. (2014). *Methanosaeta* vs. *Methanosarcina* in anaerobic digestion: the quest for  
546 enhanced biogas production. PhD thesis, Ghent University, Belgium.
- 548 De Vriezea, J., Christiaens, M.E.R., Walraedt, D., Devooght, A., Ijaz, U.Z., Boon, N. (2017).  
Microbial community redundancy in anaerobic digestion drives process recovery after salinity  
550 exposure. *Water Res*; 111: 109 – 117.
- 552 Doloman, A., Soboh, Y., Walters, A.J., Sims, R.C., Miller, C.D. (2017): Qualitative analysis of  
microbial dynamics during anaerobic digestion of microalgal biomass in a UASB reactor. *Int J*  
554 *Microbiol*; 2017: 5291283.
- 556 Gaby JC, Zamanzadeh M, Horn SJ. (2017). The effect of temperature and retention time on  
methane production and microbial community composition in staged anaerobic digesters fed  
558 with food waste. *Biotechnol Biofuels*; 10:302.

- 560 Goris, J., Konstantinidis, K.T., Klappenbach, J.A., Coenye, T., Vandamme, P., Tiedje, J.M.  
562 (2007). DNA–DNA hybridization values and their relationship to whole-genome sequence  
similarities. *Int J Syst Evol Microbiol*; 57(1):81 – 91.
- 564 Hafner, S.D., Rennuit, C. (2017). Predicting methane and biogas production with the biogas  
package. URL [https://cran.r-project.org/web/packages/biogas/vignettes/predBg\\_function](https://cran.r-project.org/web/packages/biogas/vignettes/predBg_function).
- 566
- 568 Hanreich, A., Schimpf, U., Zakrzewski, M., Schlüter, A., Benndorf, D., Heyer, R., Rapp, E.,  
Pühler, A., Reichl, U., Klocke, M. (2013) Metagenome and metaproteome analyses of  
570 microbial communities in mesophilic biogas-producing anaerobic batch fermentations  
indicate concerted plant carbohydrate degradation. *Syst Appl Microbiol*; 36: 330 – 338.
- 572 Hardegen, J.; Latorre-Pérez, A.; Vilanova, C.; Günther, T.; Porcar, M.; Luschnig, O.;  
574 Simeonov, C.; Abendroth, C. (2018) Methanogenic community shifts during the transition  
from sewage mono-digestion to co-digestion of grass biomass. *Bioresour Technol*; 265: 275  
– 281.
- 576
- 578 Jeris, J.S., McCarty, P.L. (1965). The biochemistry of methane fermentation Using C<sup>sup</sup>  
14<sup>^</sup> tracers. *J Water Fallut Control Fed*; 37: 178 – 192.
- 580 Jiang, Y., Banks, C., Zhang, Y., Heaven, S., Longhurst, P. (2018). Quantifying the percentage  
of methane formation via acetoclastic and syntrophic acetate oxidation pathways in  
582 anaerobic digesters. *Waste Manag*; 71: 749 – 756.
- 584 Kanehisa, Furumichi, M., Tanabe, M., Sato, Y., and Morishima, K. (2017). KEGG: new  
perspectives on genomes, pathways, diseases and drugs. *Nucleic Acids Res*; 45: D353-  
586 D361.
- 588 Kato, S., Hashimoto, K., Watanabe, K. (2012). Methanogenesis facilitated by electric  
syntrophy via (semi)conductive iron-oxide minerals. *Environ Microbiol*; 14, 1646 – 1654.
- 590
- 592 Kato, S., Igarashi, K. (2018) Enhancement of methanogenesis by electric syntrophy with  
biogenic iron-sulfide minerals. *Microbiologyopen*; 6:e00647.

594

Kerkhof, L.J., Dillon, K.P., Häggblom, M.M., McGuinness, L.R. (2017). Profiling bacterial communities by MinION sequencing of ribosomal operons. *Microbiome*; 5(1): 116.

596

598 Kim, D., Song, L., Breitwieser, F. and Salzberg, S. (2016). Centrifuge: rapid and sensitive classification of metagenomic sequences. *Genome Res*; 26(12): 1721 – 1729.

600

Kirkegaard, R.H., McIlroy, S.J., Kristensen, J.M., Nierychlo, M., Karst, S.M., Dueholm, M.S., Albertsen, M., Nielsen, P.H. (2017) The impact of immigration on microbial community composition in full-scale anaerobic digesters. *Sci Reports*; 7: 9343.

602

604

Klindworth, A., Pruesse, E., Schweer, T., Peplies, J., Quast, C., Horn, M. and Glöckner, F. (2013). Evaluation of general 16S ribosomal RNA gene PCR primers for classical and next-generation sequencing-based diversity studies. *Nucleic Acids Res*; 41: pp.e1-e1.

606

608

Kuczynski, J., Stombaugh, J., Walters, W., González, A., Caporaso, J. and Knight, R. (2011). Using QIIME to Analyze 16S rRNA Gene Sequences from Microbial Communities. *Curr Protoc Microbiol*; Chapter 1:Unit 1E.5.

610

612

Lindkvist, E., Johansson, M. T., Rosenqvist, J. (2017). Methodology for analysing energy demand in biogas production plants - A comparative study of two biogas plants. *Energies*; 10(11): 1822.

614

616

Lombard, V., Golaconda Ramulu, H., Drula, E., Coutinho, P.M., Henrissat, B. (2014). The Carbohydrate-active enzymes database (CAZy). *Nucleic Acids Res*; 42:D490 – D495.

618

620 Ma, X., Stachler, E., & Bibby, K. (2017). Evaluation of Oxford nanopore MinION sequencing for 16S rRNA microbiome characterization. *BioRxiv*; 099960.

622

Martins, G., Salvador, A.F., Pereira, L., Alves, M.M. (2018). Methane Production and Conductive Materials: A Critical Review. *Environ Sci Technol*; 52. 10241 – 10253.

624

626 Matsuura, N., Turlousse, D. M., Sun, L., Toyonaga, M., Kuroda, K., Ohashi, A., et al. (2015). Draft genome sequence of *Anaerolineae* strain TC1, a novel isolate from a methanogenic

- 628 wastewater treatment system. *Genome announc*; 3(5): e01104 – 15.
- 630 Maus. I., Koeck. D.E., Cibis, K.G., Hahnke, S., Kim, Y.S., Langer, T.4., Kreubel, J., Erhard,  
632 König, H., Schwarz, W.H., Zverlov, V.V., Liebl, W., Pühler, A., Schlüter, A., Klocke, M. (2016).  
634 Unraveling the microbiome of a thermophilic biogas plant by metagenome and  
636 metatranscriptome analysis complemented by characterization of bacterial and archaeal  
638 isolates. *Biotechnol Biofuels*; 9: 171.
- 640 Meier-Kolthoff, J.P., Auch, A.F., Klenk, H.-P., Göker, M. (2013). Genome sequence-based  
642 species delimitation with confidence intervals and improved distance functions. *BMC  
644 Bioinformatics* 14: 60.
- 646 Mizoguchi, T., Isaji, M., Harada, J., Tamiaki, H. (2012). Isolation and pigment composition of  
648 the reaction centers from purple photosynthetic bacterium *Rhodopseudomonas palustris*  
650 species. *Biochim Biophys Acta*; 1817(3): 395 – 400.
- 652 Na, S. I., Kim, Y. O., Yoon, S. H., Ha, S. M., Baek, I. & Chun, J. (2018). UBCG: Up-to-date  
654 bacterial core gene set and pipeline for phylogenomic tree reconstruction. *J Microbiol* 56: 280  
656 – 285
- 658 Nurk, S., Meleshko, D., Korobeynikov, A. and Pevzner, P. (2017). metaSPAdes: a new  
660 versatile metagenomic assembler. *Genome Res*; 27(5): 824 – 834.
- 662 Ondov, B.D., Treangen, T.J., Melsted, P., Mallonee, A.B., Bergman, N.H. et al. (2016) Mash:  
fast genome and metagenome distance estimation using MinHash. *Genome Biol*; 17: 132.
- 664 Parks, D., Imelfort, M., Skennerton, C., Hugenholtz, P. and Tyson, G. (2015). CheckM:  
656 assessing the quality of microbial genomes recovered from isolates, single cells, and  
658 metagenomes. *Genome Res*; 25(7): 1043 – 1055.
- 660 Pinnell, L. J., Dunford, E., Ronan, P., Hausner, M., Neufeld, J. D. (2014). Recovering  
662 glycoside hydrolase genes from active tundra cellulolytic bacteria. *Can J Microbiol*; 60(7):  
469 – 476.

- 664 Poehlein, A., Yutin, N., Daniel, R., Galperin, M. Y. (2017). Proposal for the reclassification of  
obligately purine-fermenting bacteria *Clostridium acidurici* (Barker 1938) and *Clostridium*  
666 *purinilyticum* (Dürre et al. 1981) as *Gottschalkia acidurici* gen. nov. comb. nov. and  
*Gottschalkiapurinilytica* comb. nov. and of *Eubacterium angustum* (Beuscher and Andreesen  
1985) as *Andreesenia angusta* gen. nov. comb. nov. in the family *Gottschalkiaceae* fam. nov.  
668 *Int J Syst Evol Microbiol*; 67(8): 2711 – 2719.
- 670 Preeti Rao, P., Shivaraj, D., Seenayya, G. (1993). Succession of microbial population in cow  
dung and poultry litter waste digesters during methanogenesis. *World J Microbiol Biotechnol*;  
672 33, 185 – 185.
- 674 Reverso, R.: Patent(2017), WO2017/085080A1
- 676 Richards, B.K., Herndon, F.G., Jewell, W.J., Cummings, R.J., White, T.E. (1994). *In situ*  
methane enrichment in methanogenic energy crop digesters. *Biomass and Bioenergy*; 6(4):  
678 275 – 282.
- 680 Richter, M., Rosselló-Móra, R. (2009). Shifting the genomic gold standard for the prokaryotic  
species definition. *Proc Natl Acad Sci U S A*; 106(45): 19126 – 19131.
- 682 Richter, M., Rosselló-Móra, R., Glöckner, F.O., Peplies, J. (2015) JSpeciesWS: a web server  
684 for prokaryotic species circumscription based on pairwise genome comparison.  
*Bioinformatics*. pii: btv681.
- 686 Ritalahti, K.M., Justicia-Leon, S.D., Cusick, K.D., Ramos-Hernandez, N., Rubin, M.,  
688 Dornbush, J., Löffler, F.E. (2012). *Sphaerochaeta globosa* gen. nov., sp. nov. and  
*Sphaerochaeta pleomorpha* sp. nov., free-living, spherical spirochaetes. *Int J Syst Evol*  
690 *Microbiol*; 62(1): 210 – 216.
- 692 Sato, T., Atomi, H., Imanaka, T. (2007). Archaeal type III RuBisCOs function in a pathway for  
AMP metabolism. *Science*; 315(5814): 1003 – 1006.
- 694 Sawayama, S.: Patent (2000), US006106719A
- 696 Stams, A.J.M., Plugge, C. (2009) Electron transfer in syntrophic communities of anaerobic



- 698 bacteria and archaea. *Nature* 7: 568 – 577.  
568–577.
- 700  
Sundberg, C., Al-Soud, W.A., Larsson, M., Alm, E., Yekta, S.S., Svensson, B.H., Sørensen,  
702 S.J., Karlsson, A. (2013). 454 pyrosequencing analyses of bacterial and archaeal richness in  
21 full-scale biogas digesters. *FEMS Microbiol Ecol*; 85(3): 612 – 626.
- 704  
Tada, C., Tsukahara, K., Sawayama, S. (2006). Illumination enhances methane production  
706 from thermophilic anaerobic digestion. *Appl Microbiol Biotechnol*; 71(3): 363 – 368.
- 708 Tessler, M., Neumann, J.S., Afshinnekoo, E., Pineda, M., Hersch, R., Velho, L.F.M. et al.  
(2017). Large-scale differences in microbial biodiversity discovery between 16S amplicon  
710 and shotgun sequencing. *Sci Rep*; 7(1): 6589.
- 712 Wang, S., Hou, X., Su, H. (2017). Exploration of the relationship between biogas production  
and microbial community under high salinity conditions. *Sci Rep*; 7: 1149
- 714  
Wattam, A.R., Davis, J.J., Assaf, R., Boisvert, S., Brettin, T. et al. (2017) Improvements to  
716 PATRIC, the all-bacterial Bioinformatics Database and Analysis Resource Center. *Nucleic  
Acids Res*; 45: D535 – D542.
- 718  
Wei, H., Okunishi, S., Yoshikawa, T., Kamei, Y., Maeda, H. (2016). Isolation and  
720 characterization of a purple non-sulfur photosynthetic bacterium *Rhodopseudomonas  
faecalis* strain A from swine sewage wastewater. *Biocontrol Sci*; 21: 29 – 36.
- 722  
Wu, Y., Simmons, B. and Singer, S. (2015). MaxBin 2.0: an automated binning algorithm to  
724 recover genomes from multiple metagenomic datasets. *Bioinformatics*; 32(4): 605 – 607.
- 726 Yang, Z., Koh, S.K., Ng, W.C., Lim, R. C., Tan, H. T., Tong, Y. W., et al. (2016). Potential  
application of gasification to recycle food waste and rehabilitate acidic soil from secondary  
728 forests on degraded land in Southeast Asia. *J Environ Manage*; 172: 40 – 48.
- 730 Zhang, H., Yohe, T., Huang, L., Entwistle, S., Wu, P., Yang, Z., et al. (2018). dbCAN2: a meta  
server for automated carbohydrate-active enzyme annotation. *Nucleic Acids Res*; 46(W1):  
732 W95 – W101.

734 Zheng, Y., Harris, D.F., Yu, Z., Fu, Y., Poudel, S., Ledbetter, R.N. et al. (2018). A pathway for  
biological methane production using bacterial iron-only nitrogenase. *Nat Microbiol*; 3(3): 281.

736

Zinder SH (1984) Microbiology of anaerobic conversion of organic wastes to methane: recent  
738 developments. *ASM News*; 50: 294 – 298.

740 Zhou J, Zhang R, Liu F, Yong X, Wu X, Zheng T, Jiang M, Jia H (2016). Biogas production  
and microbial community shift through neutral pH control during the anaerobic digestion of  
742 pig manure. *Bioresour Technol*; 217: 44 – 49.

744

746

**Table 1:** Summary statistics of the reconstructed metagenome-assembled genomes (MAGs) used in this study. The completeness and contamination of each MAG were estimated with CheckM (Parks *et al.*, 2015 ) and the coverage with MaxBin2 (Wu *et al.*, 2015).

| <b>MAGs</b> | <b>Contigs</b> | <b>Genome length (Mb)</b> | <b>Coverage</b> | <b>Completeness (%)</b> | <b>Contamination (%)</b> | <b>G+C (%)</b> | <b>CDS</b> | <b>Proteins with functional assignments</b> | <b>Hypothetical proteins</b> |
|-------------|----------------|---------------------------|-----------------|-------------------------|--------------------------|----------------|------------|---------------------------------------------|------------------------------|
| 1           | 119            | 4.0                       | 76.5            | 98.4                    | 0.17                     | 64.2           | 3797       | 2725                                        | 1072                         |
| 2           | 141            | 2.7                       | 31.8            | 100                     | 0.55                     | 37.0           | 2348       | 1529                                        | 819                          |
| 4           | 319            | 3.2                       | 17.8            | 91.2                    | 0.67                     | 37.0           | 2946       | 1821                                        | 1125                         |
| 5           | 136            | 2.2                       | 10.9            | 92.0                    | 3.45                     | 53.7           | 2270       | 1266                                        | 1004                         |
| 9           | 213            | 1.2                       | 6.8             | 96.6                    | 4.96                     | 36.3           | 1191       | 585                                         | 606                          |
| 10          | 352            | 1.6                       | 6.7             | 53.5                    | 5.2                      | 31.6           | 1792       | 1027                                        | 765                          |
| 11          | 346            | 2.7                       | 5.7             | 73.4                    | 3.26                     | 53.2           | 2770       | 1297                                        | 1473                         |
| 16          | 985            | 2.8                       | 4.2             | 81.0                    | 4.63                     | 42.9           | 3459       | 2094                                        | 1365                         |

**Table 2.** Lowest common ancestor and closest type strain of each metagenome-assembled genome (MAG). The average nucleotide identity (ANI) and digital DNA-DNA hybridization (DDH) values with regard to its closest type strain are shown for each MAG.

| MAG | Lowest Common Ancestor of each MAG                                                                 | Closest type strain (GenBank assembly or RefSeq accession)                  | Digital DDH (%) | ANI (%) |
|-----|----------------------------------------------------------------------------------------------------|-----------------------------------------------------------------------------|-----------------|---------|
| 1   | <i>Bacteria;Proteobacteria;Alphaproteobacteria;Rhizobiales;Bradyrhizobiaceae; Rhodopseudomonas</i> | <i>Rhodopseudomonas faecalis</i> JCM 11668 <sup>T</sup> (NZ_QJT100000000.1) | 82.3            | 97.7    |
| 2   | <i>Bacteria;Bacteroidetes;Bacteroidia;Bacteroidales;Porphyromonadaceae;Fermentimonas</i>           | <i>Fermentimonas caenicola</i> ING2-E5B <sup>T</sup> (GCA_000953535.1)      | 97.2            | 99.2    |
| 4   | <i>Bacteria;Chloroflexi;Anaerolineae;Anaerolineales;Anaerolinaceae</i>                             | <i>Flexilinea flocculi</i> TC1 <sup>T</sup> (NZ_BBYH00000000.1)             | 35.0            | 62.1    |
| 5   | <i>Bacteria;Spirochaetes;Spirochaetia;Spirochaetales;Spirochaetaceae;Sphaerochaeta</i>             | <i>Sphaerochaeta globosa</i> Buddy <sup>T</sup> (NC_015152.1)               | 17.7            | 67.6    |
| 9   | <i>Bacteria;Firmicutes</i>                                                                         | <i>Aerococcus urinae</i> CCUG36881 <sup>T</sup> (NZ_CP014161.1)             | 28.8            | 63.1    |
| 10  | <i>Bacteria;Firmicutes;Clostridia;Clostridiales;Gottschalkiaceae</i>                               | <i>Gottschalkia purinolytica</i> DSM 1384 <sup>T</sup> (NZ_LGSS00000000.1)  | 16.3            | 69.6    |
| 11  | <i>Bacteria;Spirochaetes;Spirochaetia;Spirochaetales;Spirochaetaceae;Treponema</i>                 | <i>Treponema primitia</i> ZAS-2 <sup>T</sup> (NZ_AEEA00000000.1)            | 20.7            | 65.4    |
| 16  | <i>Archaea;Euryarchaeota;Methanomicrobia;Methanosarcinales;Methanosarcinaceae; Methanosarcina</i>  | <i>Methanosarcina mazei</i> S-6 <sup>T</sup> (NZ_CP009512.1)                | 92.1            | 99.0    |

**Table 3:** Summary of metabolic pathways identified in each metagenome-assembled genome (MAG). ND, not detected.

| Pathway                                                | MAG 1  | MAG 2  | MAG 4  | MAG 5  | MAG 9 | MAG 10 | MAG 11 | MAG 16          |
|--------------------------------------------------------|--------|--------|--------|--------|-------|--------|--------|-----------------|
| Fermentation                                           | Active | Active | ND     | Active | ND    | Active | ND     | ND              |
| Homoacetogenesis <sup>a</sup>                          | ND     | ND     | ND     | ND     | ND    | ND     | Active | Active          |
| Acetogenesis                                           | ND     | Active | Active | ND     | ND    | ND     | ND     | ND              |
| Methanogenesis from acetate                            | ND     | ND     | ND     | ND     | ND    | ND     | ND     | Active          |
| Methanogenesis from CO <sub>2</sub> and H <sub>2</sub> | ND     | ND     | ND     | ND     | ND    | ND     | ND     | ND              |
| Methanogenesis from methanol                           | ND     | ND     | ND     | ND     | ND    | ND     | ND     | ND              |
| Calvin-Benson cycle <sup>b</sup>                       | Active | ND     | ND     | ND     | ND    | ND     | ND     | ND <sup>b</sup> |
| Photosystem II-type photosynthetic reaction center     | Active | ND     | ND     | ND     | ND    | ND     | ND     | ND              |
| Nitrogen fixation                                      | Active | ND     | ND     | ND     | ND    | ND     | ND     | ND              |

<sup>a</sup> Reductive acetyl-CoA or Wood-Ljungdahl pathway

<sup>b</sup> Type III ribulose-1,5-bisphosphate carboxylase-oxygenase (RuBisCO) is present.

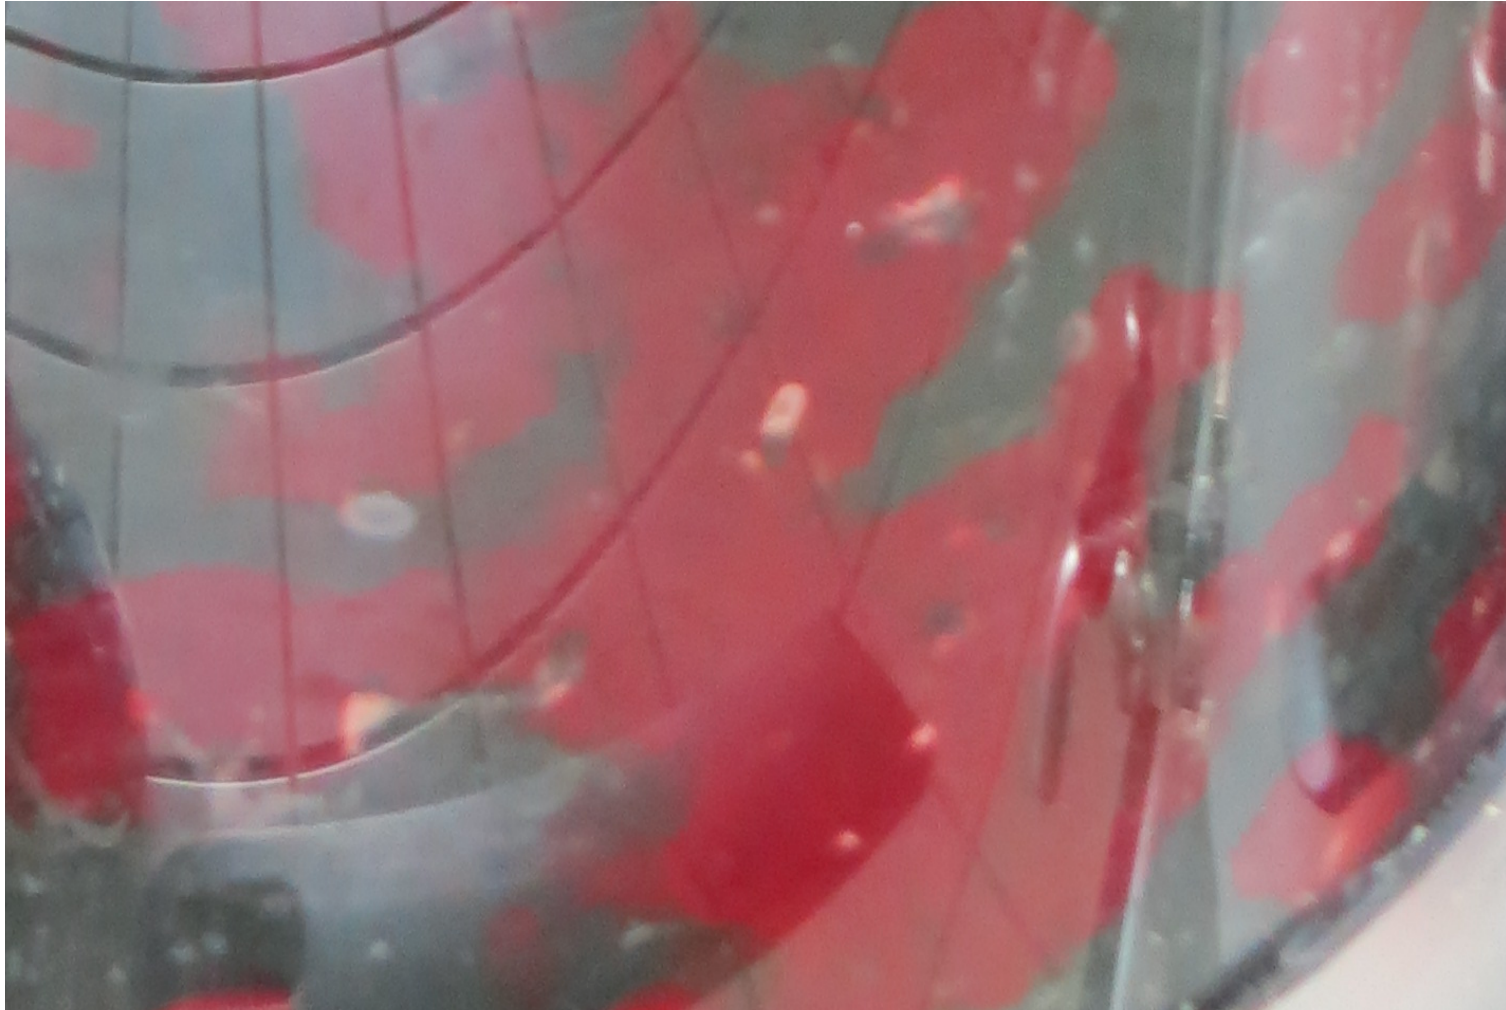

**Fig. 1.** Photograph of the transparent wall of the anaerobic digester used to analyse the effect of natural sunlight on the microbial community. After three weeks operating de anaerobic digester, a red-pigmented microbial biofilm grew on the inner wall of the reactor forming irregular patches.

A)

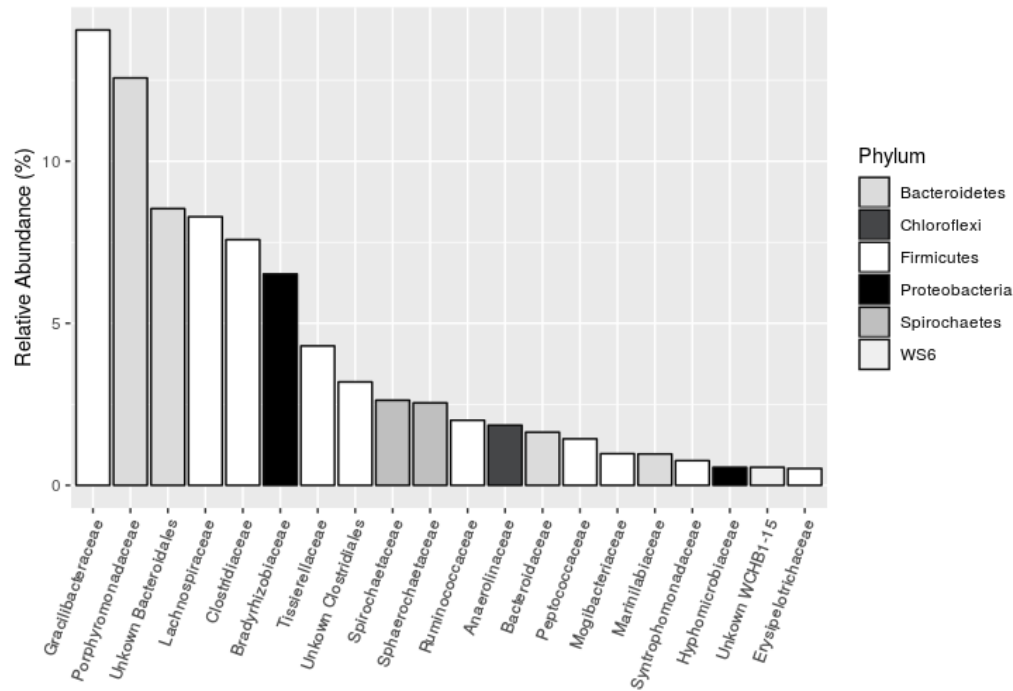

B)

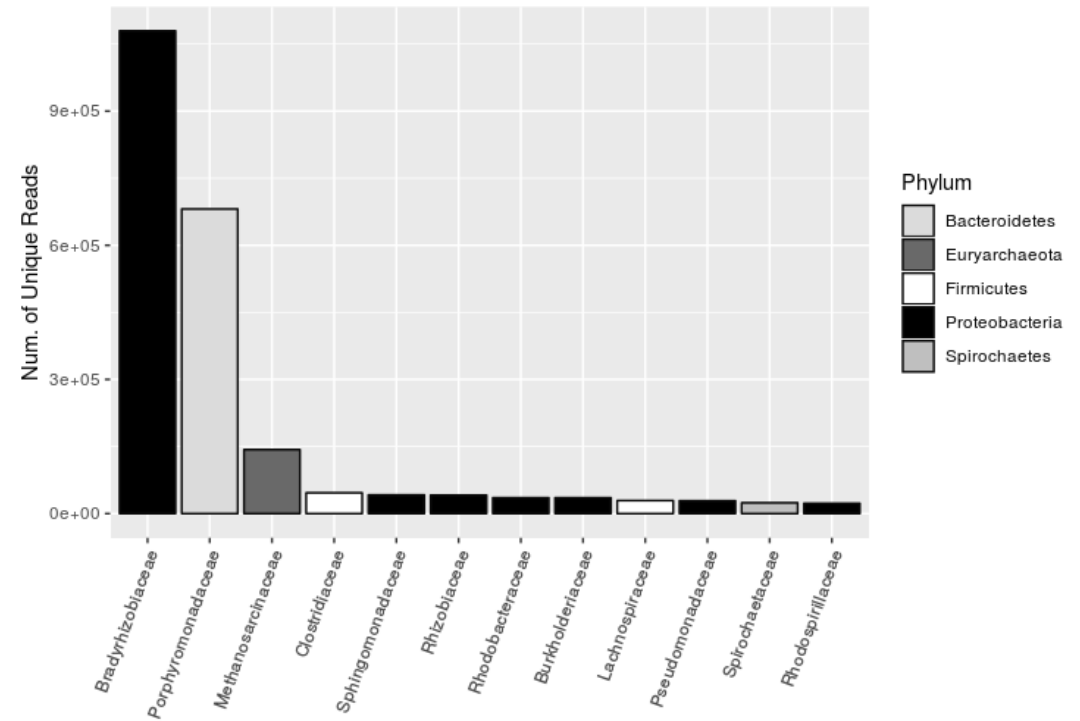

**Fig. 2.** (A) Taxonomic classification of the full-length 16S rRNA reads sequenced with the Nanopore technology. Reads were blasted against the GreenGenes database (v 13.8). Only those families with a relative abundance higher than 0.5% are shown. (B) Taxonomic classification of the shotgun metagenomic Illumina reads. Reads were mapped against a database containing reference sequences from *Bacteria* and *Archaea* (updated April 15, 2018; available at <https://ccb.jhu.edu/software/centrifuge/>). Only the top 12 most abundant families are shown.

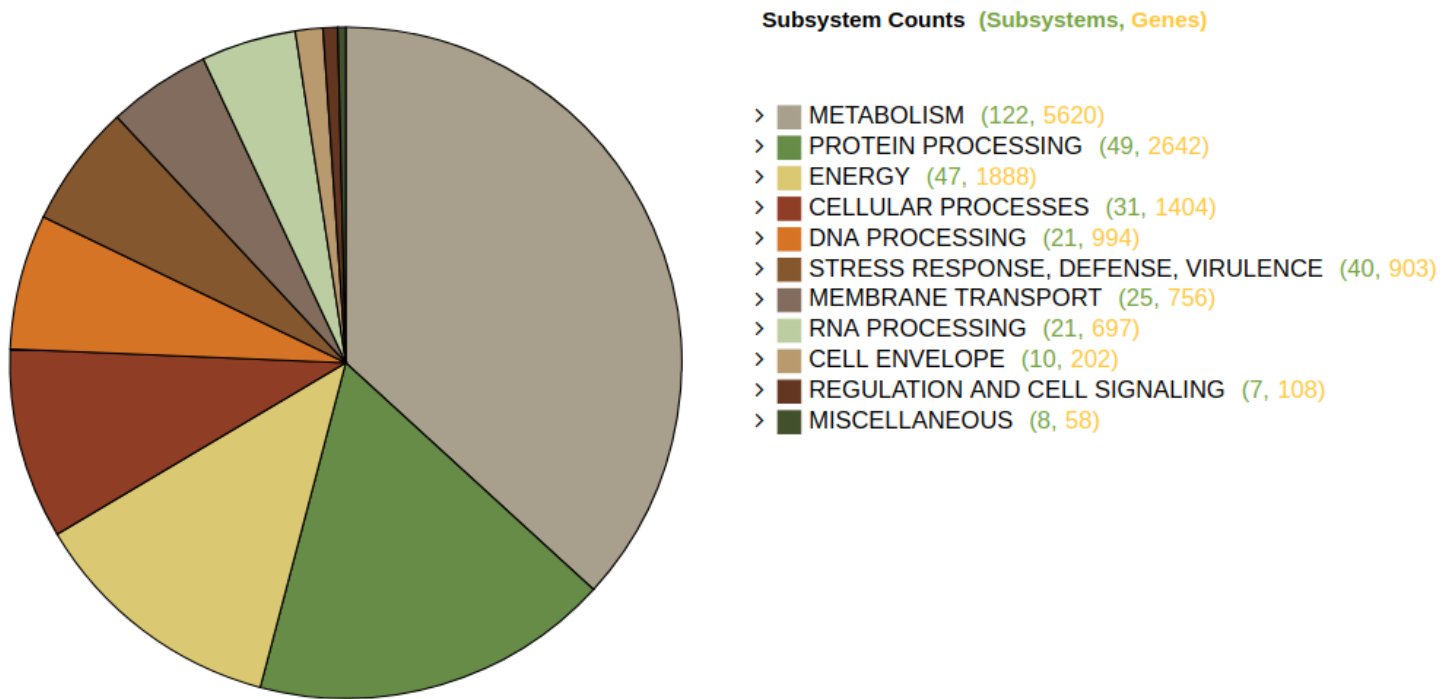

**Fig. 3.** Classification of annotated coding sequences (CDS) in functional subsystems.



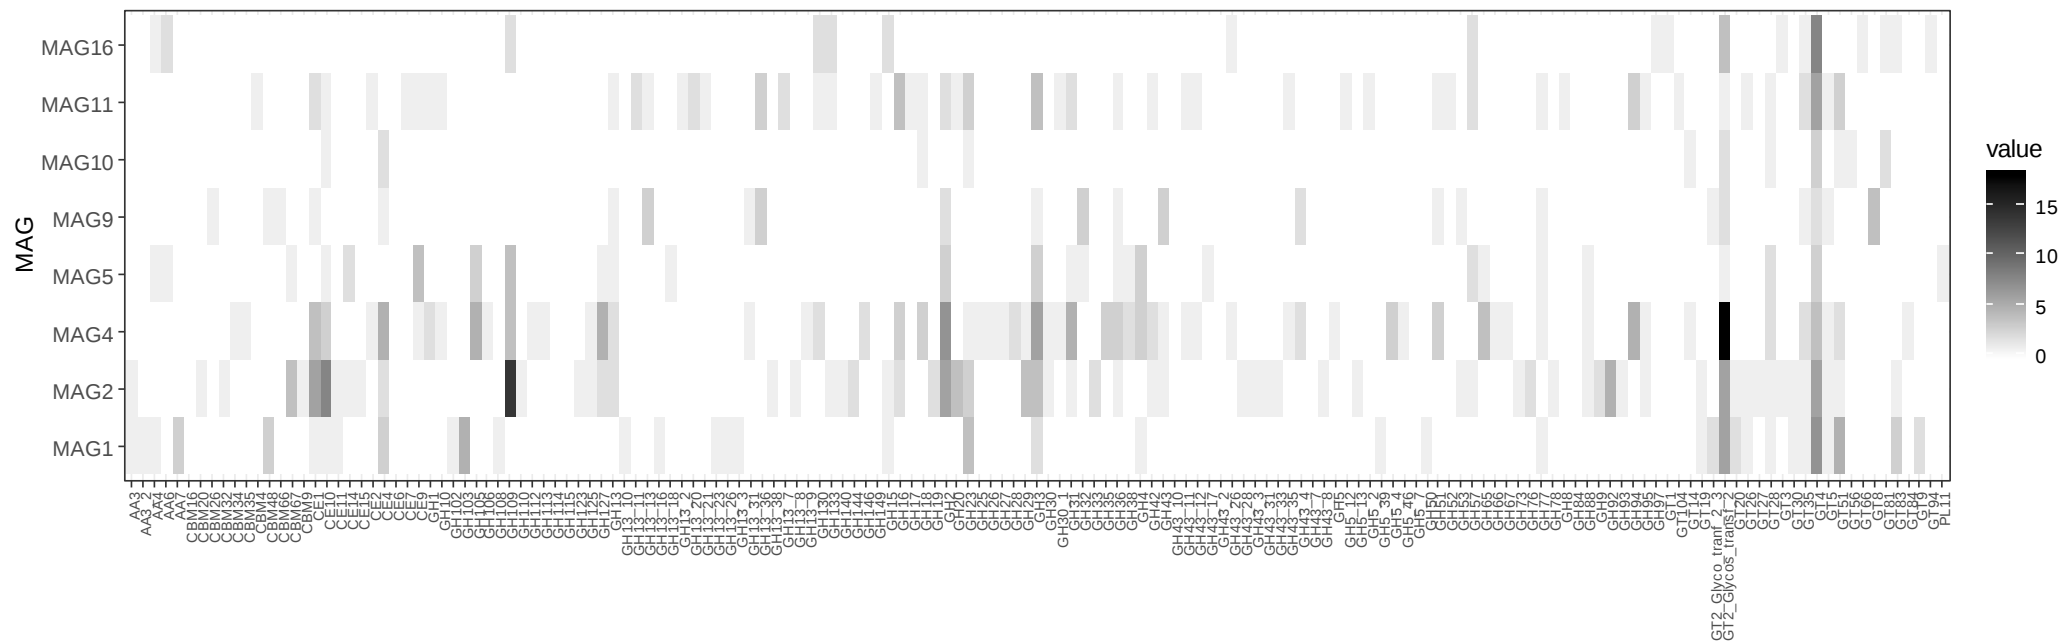

**Fig. 4.** Heatmap of Carbohydrate-Active Enzymes (CAZymes) families found in each of the eight metagenome-assembled genomes. Both CAZY families and MAGs are listed alphabetically. The color intensity corresponds to the number of protein-coding genes identified in each family. CAZyme family codes: GT, glycosyltransferases; GH, glycoside hydrolases; CE, carbohydrate esterases; PL, polysaccharide lyases; CBM, carbohydrate binding modules; AA, axillary activities (oxidative enzymes).
